# Supplementary material for: Alanine, proline and urea are major organic osmolytes in the snailTheodoxus fluviatilisunder hyperosmotic stress
Source: Oxford University Press journal article supplement (doi:10.1242/jeb.193557), 2019-01-01
Supplement: jeb193557supp.pdf [file jeb193557supp.pdf]

## Supplemental Material

[Click here to Download Table S1](#)
